# Supplementary material for: Toll-like Receptor 2 Mediated Immune Regulation in Simian Immunodeficiency Virus-Infected Rhesus Macaques
Source: MDPI journal article supplement (doi:10.3390/vaccines11121861), 2023-12-17
Supplement: s1 [file s1]

**Table S1. List of monoclonal antibodies used for flow cytometry assay**

| <b>Antibody</b>              | <b>Clone</b> | <b>Amount used<br/>(<math>\mu</math>L)</b> | <b>Source</b>         |
|------------------------------|--------------|--------------------------------------------|-----------------------|
| Anti-human CD3               | SP34-2       | 5                                          | BD Biosciences, CA    |
| Anti-human CD4               | L200         | 3                                          | BD Biosciences, CA    |
| Anti-human CD8               | SK1          | 3                                          | BD Biosciences, CA    |
| Anti-human CD14              | M5E2         | 5                                          | Biolegend, CA         |
| Anti-human CD20              | 2H7          | 2                                          | Biolegend, CA         |
| Anti-NHP CD45                | D058-1283    | 5                                          | BD Biosciences, CA    |
| Anti-human TLR2              | TL2.1        | 5                                          | Biolegend, CA         |
| Live/dead fixable aqua stain | -            | 25; 1:100 dilution                         | Life Technologies, CA |
