# Supplementary figures and images for: Toll-like Receptor 2 Mediated Immune Regulation in Simian Immunodeficiency Virus-Infected Rhesus Macaques
Source: MDPI journal article supplement (doi:10.3390/vaccines11121861), 2023-12-17

## Monocytes

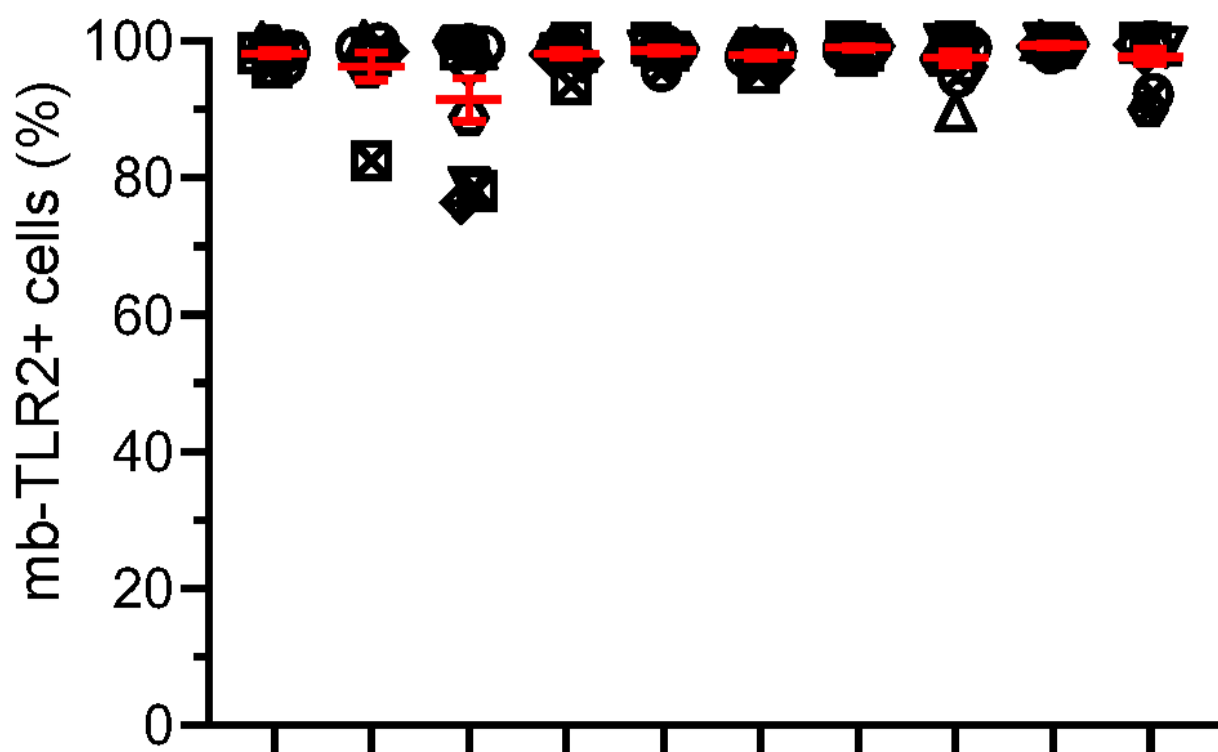

B

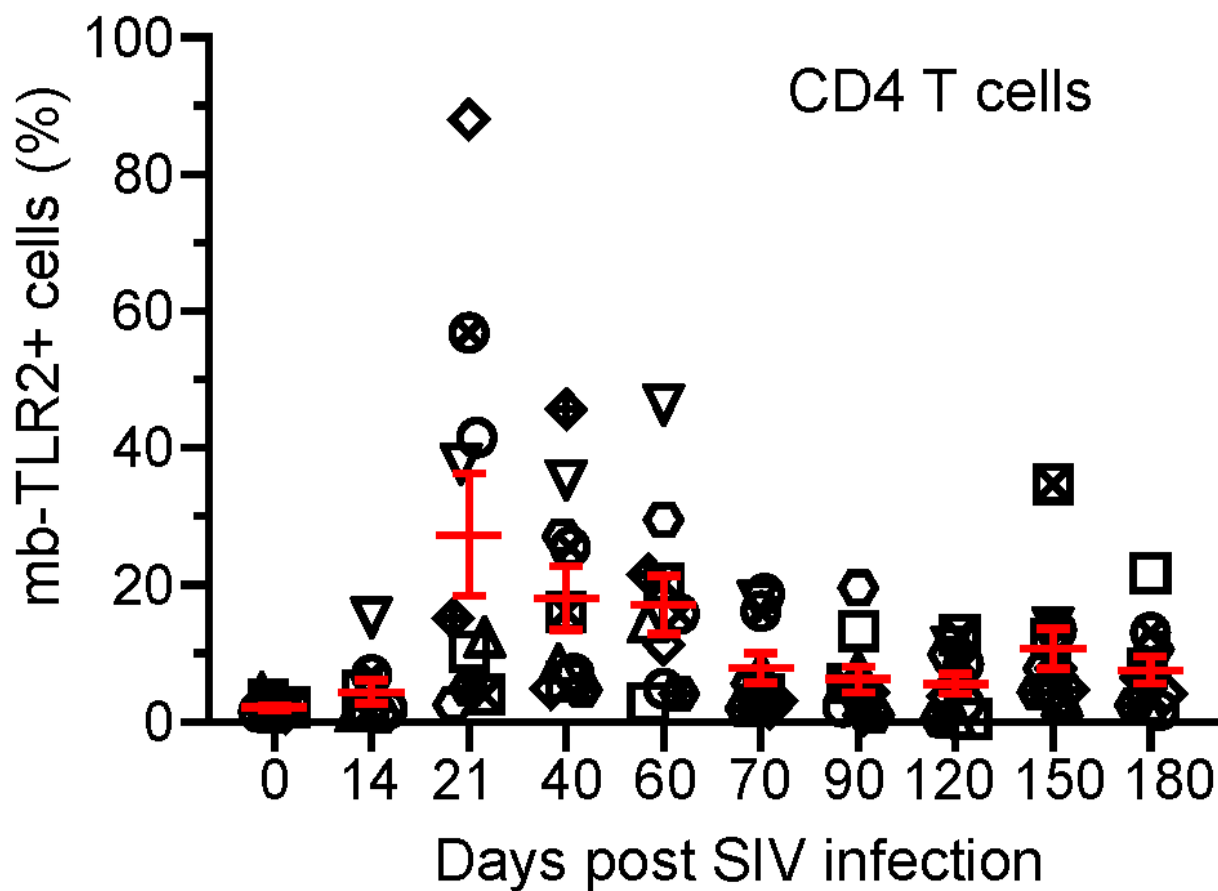

Supplement: s1 [file s1]

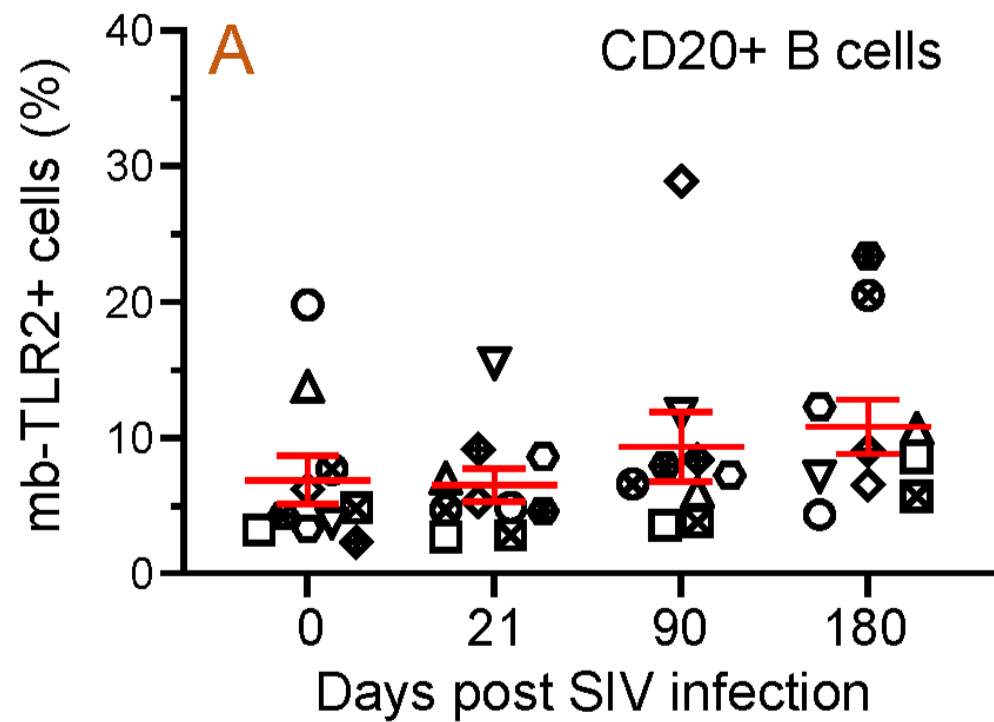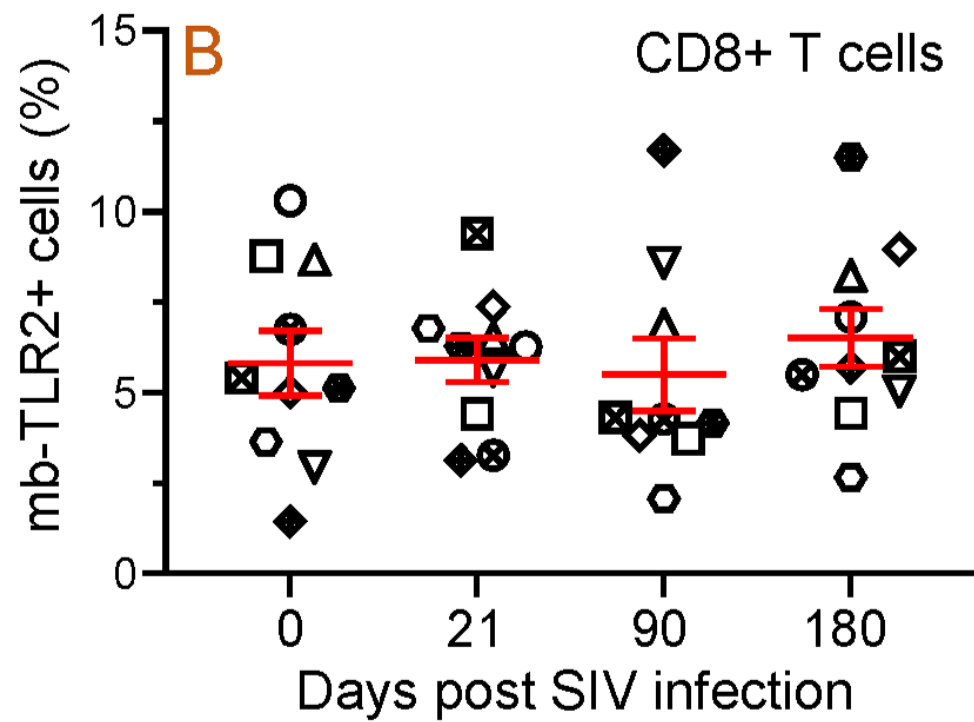

Supplement: s1 [file s1]

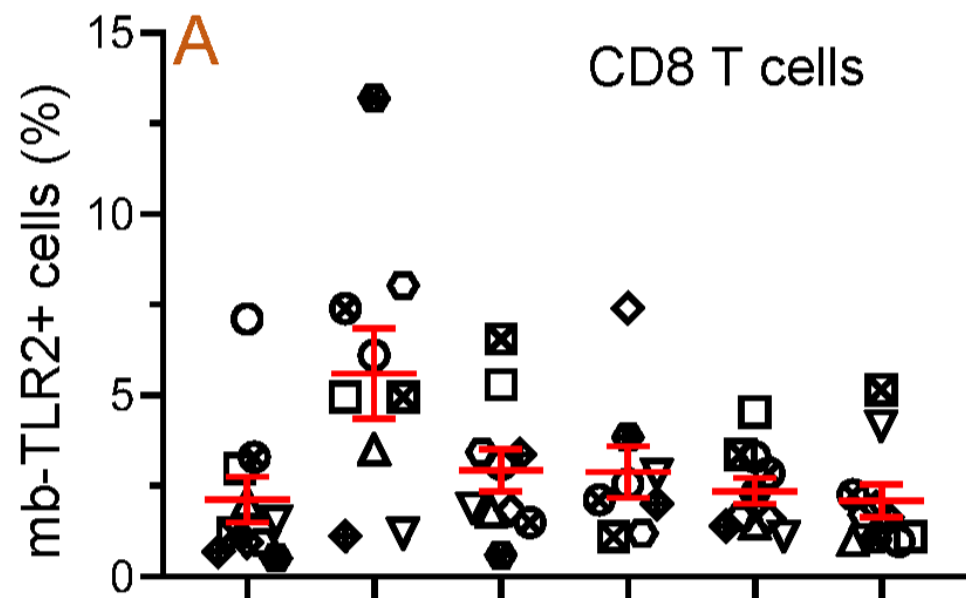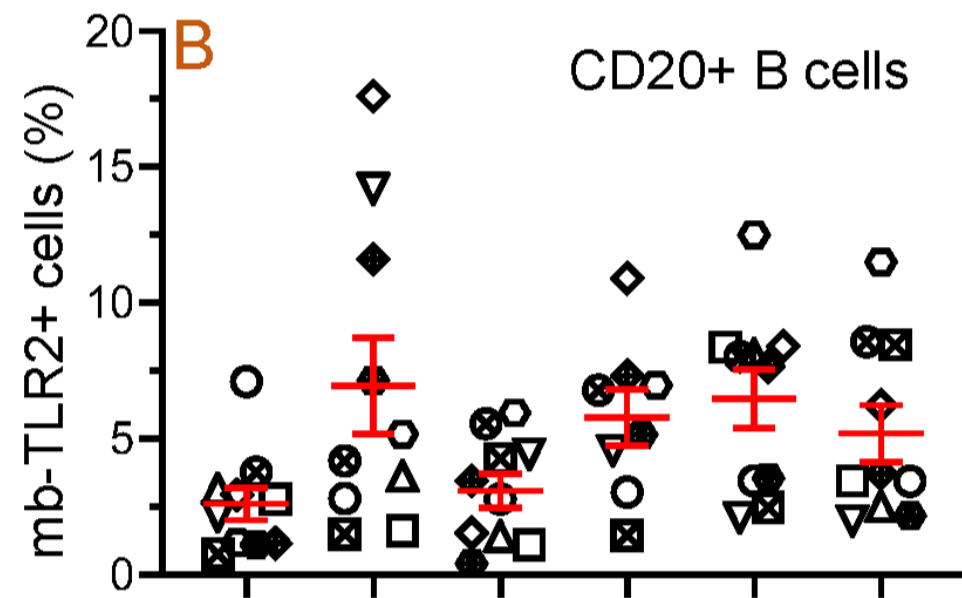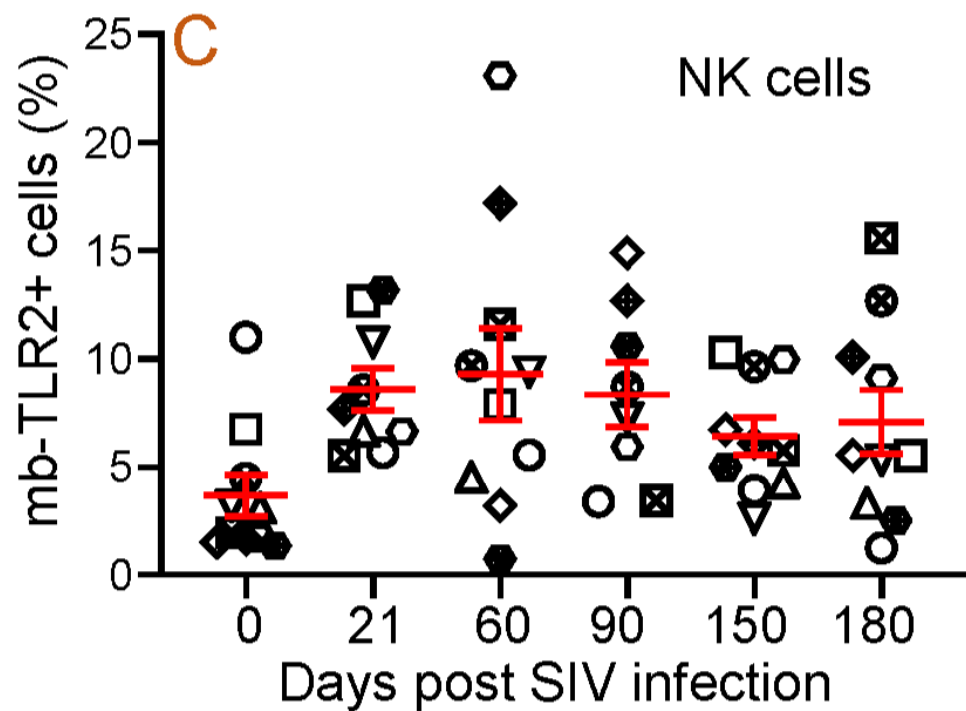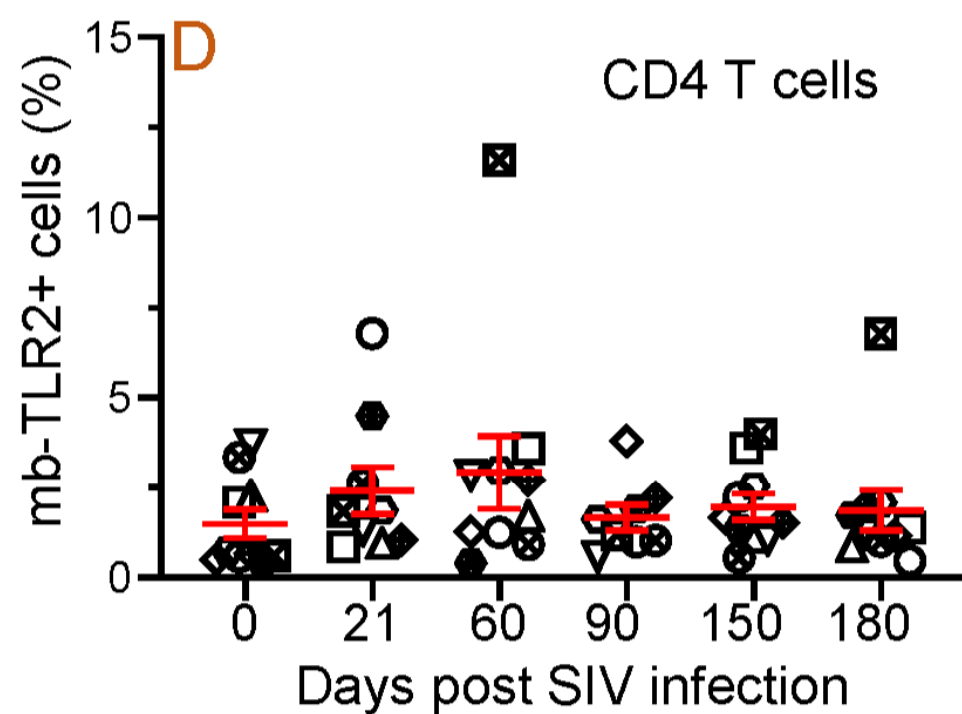

Supplement: s1 [file s1]
